# Supplementary material for: Chronic mirabegron treatment increases human brown fat, HDL cholesterol, and insulin sensitivity
Source: JCI journal article supplement (doi:10.1172/jci131126), 2020-01-21
Supplement: sd2 [file 2]

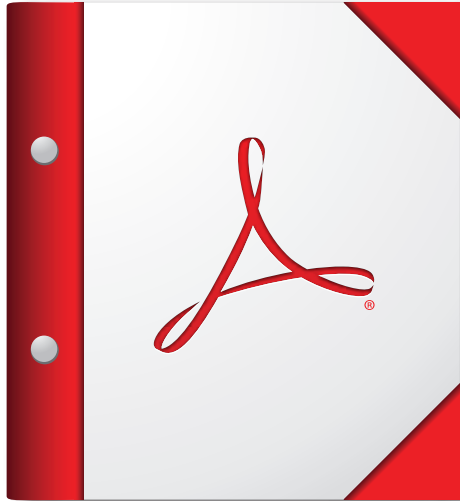

**For the best experience, open this PDF portfolio in  
Acrobat X or Adobe Reader X, or later.**

[Get Adobe Reader Now!](#)
